# Supplementary material for: Effect of high pressure homogenization on in vitro digestibility and colon fermentability of pea protein-rich bread designed for elderly consumers
Source: Royal Society of Chemistry journal article supplement (doi:10.1039/d4fo02767a), 2024-01-01
Supplement: d4fo02767a1.pdf [file d4fo02767a1.pdf]

## Supplemental materials

### **Effect of high pressure homogenization on *in vitro* digestibility and colon fermentability of pea protein-rich bread designed for elderly consumers**

Martina Moretton<sup>a,b</sup>, Melania Casertano<sup>c</sup>, Nicoletta Pellegrini<sup>c,d</sup>, Monica Anese<sup>d</sup>, Vincenzo Fogliano<sup>c</sup>, Edoardo Capuano<sup>c\*</sup>

<sup>a</sup> Research and Innovation Centre, Fondazione Edmund Mach, San Michele all'Adige, Italy

<sup>b</sup> ONFoods - Research and innovation network on food and nutrition Sustainability, Safety and Security - Working ON Foods, Parma, Italy

<sup>c</sup> Food Quality and Design Group, Wageningen University, Wageningen, The Netherlands

<sup>d</sup> Department of Agricultural, Food, Environmental and Animal Sciences, University of Udine, Italy

Table S1 Dry matter and protein content, corrected by the protein contribution from the digestive enzymes, of the pellet of wheat bread (W), pea protein bread (PP) and HPH-treated pea protein bread (HPH-PP) at the end of the small intestinal phase under the adult and elderly GI conditions.

| Bread type | Dry matter (%)            |                         | Protein content in the pellet (g) |                          | Protein content in the pellet (%) |                        |
|------------|---------------------------|-------------------------|-----------------------------------|--------------------------|-----------------------------------|------------------------|
|            | Adult                     | Elderly                 | Adult                             | Elderly                  | Adult                             | Elderly                |
| W          | 17.6 ± 1.2 <sup>a</sup>   | 18.9 ± 1.2 <sup>B</sup> | 0.01 ± 0.00 <sup>b</sup>          | 0.03 ± 0.01 <sup>B</sup> | 0.4 ± 0.0 <sup>b,*</sup>          | 1.0 ± 0.4 <sup>b</sup> |
| PP         | 18.2 ± 0.8 <sup>a,*</sup> | 20.9 ± 0.6 <sup>A</sup> | 0.04 ± 0.00 <sup>a,*</sup>        | 0.07 ± 0.01 <sup>A</sup> | 1.4 ± 0.1 <sup>a,*</sup>          | 2.9 ± 0.2 <sup>a</sup> |
| HPH-PP     | 18.1 ± 1.2 <sup>a,*</sup> | 20.6 ± 1.8 <sup>A</sup> | 0.03 ± 0.00 <sup>a,*</sup>        | 0.07 ± 0.00 <sup>A</sup> | 1.2 ± 0.1 <sup>a,*</sup>          | 2.8 ± 0.1 <sup>a</sup> |

Lower letters indicate a statistically significant ( $p < 0.05$ ) difference between bread types at the end of the gastric and intestinal phase under adult GI conditions. Capital letters indicate a statistically significant ( $p < 0.05$ ) difference among bread types at the end of gastric and small intestinal phase under the elderly GI conditions. \*: indicate statistically significant ( $p < 0.05$ ) difference between physiological conditions (adult and the elderly) within each bread type.
